# Supplementary material for: Pattern recognition receptor agonists in pathogen vaccines mediate antitumor T-cell cross-priming
Source: PubMed Central journal article supplement — J Immunother Cancer. 2023 Jul 21;11(7):e007198. doi: 10.1136/jitc-2023-007198 (PMC10373699; doi:10.1136/jitc-2023-007198), 2023-07-21
Supplement: jitc-2023-007198supp001.pdf [file jitc-2023-007198supp001.pdf]

## Supplemental Materials and Methods

### Cell lines

A20 lymphoma and 4T1 breast cancer cells were maintained at 37°C with 5% CO<sub>2</sub> in RPMI supplemented with 10% heat-inactivated FCS, 100 U/ml penicillin/streptomycin/ampicillin, and 50 μM 2-mercaptoethanol. GFP-A20, mCherry-A20, and B2m<sup>-/-</sup>GFP-A20 lymphoma cells were generated as previously described.(1) RAW264.7 (RAW) macrophage cells were a gift from Dr. Shu Hsia Chen, and were maintained at 37°C with 5% CO<sub>2</sub> in DMEM with Glutamax (Gibco) with 10% heat-inactivated FCS and 100U/ml penicillin/streptomycin/ampicillin.

TLR<sup>-/-</sup> RAW were generated by CRISPR-Cas9 gene editing. Guide RNA targeting exon 3 of TLR2 (5'- GCTCGGCGATTTC AACCCCT-3'), exon 1 of TLR4 (5'- GTCCTAGCCAGGAGCCAGGG-3'), exon 3 of TLR7 (5-GCAGGAGCTCTGTCCTTGAG-3'), or exon 2 of TLR9 (5-GCTGGGCAGTCGGGGCACAG-3') were cloned into lentiCRISPRv2 (Addgene plasmid #52961) and transduced into RAW. After 1 week of 4ug/mL puromycin selection, surviving cells were single-cell sorted into 96-well plates. Viable clones that formed colonies were screened for TLR activity, using 2ug/mL Pam3CSK4, LPS, R848, and CpG (Invivogen). TLR<sup>-/-</sup> RAW cells were activated for 24hrs with TLR ligands; activation was measured as upregulation of CD40 by flow cytometry. A single clone from each generated TLR<sup>-/-</sup> cell line was selected based on lack of reactivity to respective TLR ligand while maintaining activity in non-targeted TLRs. An empty vector control cell line was generated by transduction with lentivirus encoding lentiCRISPRv2 plasmid and used as TLR-competent control (referred to as EV RAW).

### Flt3L treatment *in vivo* and splenocyte isolation for murine phenotypic and functional assays

Balb/c WT, C57BL/6 WT, C57BL/6-MyD88<sup>-/-</sup>, and C57BL/6-TRIF<sup>-/-</sup> mice were treated *in vivo* with intraperitoneal injection of 30ug Flt3L (Celldex) for 9 days, as previously described (1). On day 10, mice were sacrificed, spleens were dissected, and single cell suspensions were obtained by mechanical disruption and filtering through a 70 μm cell strainer. Red blood cells were lysed using ACK buffer (Lonza). Flt3L-splenocytes, used as a DC source, were used fresh, or frozen in media containing 20% heat-inactivated FCS and 10% DMSO for later use. For a subset of experiments, CD11c<sup>+</sup> isolation was performed using magnetic separation with CD11c ultrapure microbeads (Miltenyi).

### Multiplex bead assay (Luminex) for DC cytokine production

CD11c<sup>+</sup> cells isolated from Flt3L splenocytes were resuspended at 1x10<sup>6</sup> cells/mL in RPMI and plated in 96-well plates. Following 24hr activation with synthetic TLRa or naPRRa, supernatants were collected and stored at -80°C until analysis. Samples were analyzed in duplicates by a 32-plex Luminex assay (Millipore). Morpheus software from the Broad Institute was used to generate heatmaps, with hierarchical clustering by k-means.

### RT-qPCR

Flt3L splenocytes were plated at 1x10<sup>6</sup> cells/200uL in 96-well plates. After 12hr activation with naPRRa or synthetic TLRa, RNA was extracted by RNeasy Mini Kit (Qiagen), and cDNA synthesized using SuperScript III First-Strand Synthesis SuperMix (Invitrogen). Quantitative RT-PCR was performed using PowerUP SYBR Green Master Mix (Applied Biosystems)

and primers listed in Supplemental Table III, and technical duplicates per sample were amplified on a BIO-RAD CFX384 Real-Time System, C1000 Touch Thermal Cycler. Results were quantified using the  $\Delta\Delta C_t$  method (normalized to 18s rRNA).

#### **OT-I ovalbumin cross-presentation assay**

Flt3L splenocytes from C57BL/6 mice were resuspended at  $1 \times 10^6$  cells/mL in RPMI with 10ug/mL ovalbumin protein and plated at 200uL/well in a deep 96-well assay block plate (Corning). After 24hrs, synthetic TLRa or naPRRa were added to wells. After 24hrs of activation, spleen and LNs were removed from OT-I mice and processed as described above. OT-I cells were stained with CellTrace Violet (ThermoFisher) and labeled OT-I cells were then added at a Flt3L splenocyte:OT-I splenocyte ratio of 1:5. OT-I activation was assessed by flow cytometry after 72hrs of co-culture, while proliferation was assessed after 96hrs.

#### **RAW activation assay**

WT and TLR<sup>-/-</sup>RAW cells were plated at  $5 \times 10^4$  cells/well in DMEM in 96-well flat-bottom plates. After allowing cells to adhere overnight, 2ug/mL synthetic TLRa or 5% v/v naPRRa was added. Activation was assessed after 24hrs by flow cytometry.

#### **RAW cross-presentation assay**

WT and TLR<sup>-/-</sup>RAW cells were plated in 96-well flat-bottom plates at  $2.5 \times 10^3$  cells/well. After 24hrs, 50uL B2m<sup>-/-</sup> or B2m<sup>-/-</sup>GFP- XRT A20s (prepared as described above) or 50uL GFP peptide (1ug/mL) were added to the RAW cells, together with 1ug/mL synthetic TLRa or 5% v/v nPRRa. After 24hrs, CellTrace violet-stained JEDI anti-GFP CD8 T-cells, isolated using CD8 T-cell enrichment kit (Invitrogen), were added to each well at a density of  $2.5 \times 10^5$  cells per 100uL. JEDI anti-GFP CD8 T-cell activation was assessed by flow cytometry after 72hrs of co-culture.

#### **Principal Component Analysis (PCA) and feature selection to generate predictive model of T-cell cytotoxicity**

Phenotypic data of murine splenocytes and isolated DCs, acquired by spectral flow cytometry (MFI of costimulatory markers), RT-qPCR (ISG mRNA expression), and multiplex bead assay (cytokine production) were compiled, generating a dataset of 155 unique phenotypic observations induced by each synthetic PRRa and naPRRa. Feature selection was performed on this dataset, in order identify markers that correlated with priming of cytotoxic CD8 T-cell response by Spearman correlation with Benjamini-Hochberg False Discovery Rate correction for multiple hypothesis testing. A Spearman adjusted p value of  $< 0.01$  was used as a cut-off to identify significant associations, generating a new dataset of 43 phenotypic markers that correlated with T-cell cytotoxicity. PCA was performed on both datasets. Principal Components (PC) were calculated using the `prcomp` function in R. The loading along PC1 was used as a summary metric to discriminate between putatively effective and ineffective naPRRa. Those candidates with PC1 loadings greater than Pneumovax23 in the 43 marker PCA were considered effective.

#### **Immunofluorescence Imaging**

Tumors were washed in PBS and incubated in PLP buffer (0.05M phosphate buffer containing 0.1M L-lysine [pH 7.4], 2mg/mL NaIO<sub>4</sub>, and 10mg/mL paraformaldehyde) overnight at 4°C. Tissue was equilibrated sequentially in 10%, 20%, and 30% sucrose solutions for 2hrs each before embedding in OCT (ThermoFisher) and rapidly frozen on dry ice, and then stored at -

80°C. Frozen histological tumor samples were sectioned at 10µM with a cryostat. Sections were washed in PBS for 5min. Blocking was performed in the dark at RT, for 1hr, with PBS, 2% FBS, and 1% BSA (blocking buffer). Sections were incubated overnight in 10% blocking buffer at 4°C, with conjugated antibodies staining for GFP (Biolegend, AF488, clone FM264G, 1:200), CD11c (Biolegend, AF594, clone N418, 1:200) and CD8 (Biolegend, AF647, clone 53-6.7, 1:200). Nuclei were stained with 300nM DAPI (Invitrogen). Slides were mounted with Prolong Gold anti-fade reagent (Invitrogen) and left to dry overnight. Images were acquired using a Zeiss LSM780 confocal microscope. All images were obtained at 20x magnification. Fiji software was used for post-acquisition image processing and pixel intensity quantification.

### **ISV *ex vivo* T-cell profiling assays**

GFP-A20 tumors were inoculated and ISV performed as described above. On day 11 after irradiation, tumors and draining LNs were harvested, homogenized, and passed through a 70µm cell strainer. Tumor cell suspensions were depleted of tumor cells by CD19 nanobead magnetic separation (Mojosort, BioLegend). Tumor and LN cells were either stained immediately or plated with 1µg/mL GFP peptide and Brefeldin for 6hrs prior to staining and analysis by spectral flow cytometry.

### **Exome and RNA sequencing and alignment**

Next-generation sequencing and data processing of A20 cells was performed as previously described.(2) Total DNA and RNA were purified using DNeasy Blood and Tissue Kit (QIAGEN) and RNAeasy Mini Kit (QIAGEN) from triplicate cultures of A20 lymphoma cells. SureSelectXT mouse exon kit (Agilent) was used for exome capture. Exome capture libraries were then paired-ended sequenced using an Illumina HiSeq 4000 and the HiSeq 4000 sequencing Kit (200 cycles). 50M exome reads were sequenced per sample. Barcoded mRNA-seq cDNA libraries were generated using the Illumina TruSeq V2 kit and 500ng total RNA per sample. All libraries were sequenced on an Illumina HiSeq4000 with 30M reads sequenced per sample.

DNA and RNA sequencing data was analyzed using HTSeqGenie(3) in BioConductor.(4) Reads with low nucleotide qualities (70% of bases with quality <23), matches to adapter sequences, and RNA reads matching to rRNA were removed.(5) Remaining reads were aligned to the mouse reference genome (GRCm38.p5) using GSNAP(6) (v. '2013-10-10-v2'), allowing up to 2 mismatches per 75 bases. The DNA alignment parameters were: '-M 2 -n 10 -B 2 -i 1 -pairmax-dna=1000 -terminal-threshold=1000 -gmap-mode=none -clip-overlap' and RNA alignment parameters were: '-M 2 -n 10 -B 2 -i 1 -N 1 -w 200000 -E 1 -pairmax-rna=200000 -clip-overlap.'

### **Variant Calling and Annotation**

The union of Lofreq 2.1.2(7) and Strelka1.0.14(8) SNV calls were used to call somatic variants, and only Strelka1 indel calls. Indel qualities were assigned to alignments using 'lofreq indelqual -dindel,' and somatic mutations called using 'lofreq somatic' with the '-call-indels' option. Strelka-based somatic mutations were called using strelka\_config\_bwa\_default.ini, with 'isSkipDepthFilters = 1' instead of 'isSkipDepthFilters = 0.' modified in settings.

Somatic mutations were annotated using the Ensembl 90 Variant Effect Predictor (VEP)(9) on GENCODE M15-basic(5) based gene models. Novel and potentially expressed sequence downstream of frameshift indels, as well as downstream of stop loss mutations, were identified using the downstream plugin (EMBL-EBI, n.d.) in VEP. Nonsynonymous mutations were

identified by only retaining mutations whose consequences were: frameshift\_variant, stop\_lost, stop\_gained, start\_lost, initiator\_codon\_variant, inframe\_insertion, inframe\_deletion, missense\_variant, coding\_sequence\_variant, or protein\_altering\_variant.

### Neoantigen Prediction

The R package VariantTools 1.20.0(10) tallyVariants function and gmapR 1.20.1(11) were used to tally RNA-seq alignments for identified mutations in the exome data to identify expressed mutations. RNA reads that had mapping quality  $\geq 23$  were tallied. Each mutation's neoantigen potential was predicted by specifying A20 cell MHC-I genotype and assigning the optimal MHC-neoepitope pair across all MHC-I alleles and 8- to 11-mer peptides containing the mutation. A20 MHC-I genotype was assumed identical to BALB/c; 'H-2-Kd,' 'H-2-Dd,' and 'H-2-Ld.' Each MHC-neoepitope pair was scored based on MHC-allele-specific percentile rank of the neoepitope's IC50 score, as predicted by the NetMHCpan4.0(12) 'rank' method (via IEDB 2.19).(13)

14-25-mer peptides were synthesized and purified using the PepPower Peptide Synthesis Platform (GenScript), with peptide quality assessed by mass spectrometry and HPLC to ensure  $>75\%$  purity. Solubility of individual peptides were tested to identify adequate solvents.

### ISV T-cell neoantigen-reactivity assays

For initial screening, 14-25-mer peptides were grouped into pools containing 10-11 peptides and pulsed onto CD11c+ DCs isolated from splenocytes of Flt3L treated mice, at 20 $\mu$ g/mL. GFP-peptide, non-pulsed, and DMSO-treated DCs were used as controls (non-pulsed DCs shown as controls in figures as they did not differ from DMSO-treated DCs). After overnight pulse, DCs were co-cultured with tumor and TdLN cell suspensions from B/P/R-ISV-treated mice, prepared as described above. T-cell activation was assessed after 24hrs by flow cytometry.

### Supplementary Figure Legends

**Supplementary Figure 1: Flt3L increases DC numbers and potentiates their activation.** (a) Bar graphs showing MFI fold change of costimulatory marker expression on cDC subsets and pDCs from patient PBMCs, as defined by viSNE clustering in Fig 1a. Statistical significance between "No PRRa" and the different conditions was calculated by two-way ANOVA with Dunnett's multiple comparison test. (b) Costimulatory marker expression on DC, B cells, and macrophages measured by flow cytometry. Statistical significance between "No PRRa" and the different conditions was calculated by two-way ANOVA with Dunnett's multiple comparison test. (c) Quantification of murine splenic DCs pre- and post-Flt3L treatment by spectral flow cytometry. Statistical significance was calculated using t test with Welch's correction. (d) DC costimulatory molecule expression measured by flow cytometry. Statistical significance was calculated using one-way ANOVA and Holm-Sidak test. (e) Bar graphs showing MFI fold change of costimulatory marker expression on cDC subsets and pDCs from murine splenocytes, as defined by viSNE clustering in Fig 1b. Statistical significance between "No PRRa" and the different conditions was calculated by two-way ANOVA with Dunnett's multiple comparison test.

**Supplementary Figure 2: naPRRa-activated DCs prime patient T-cells.** (a) PBMCs from Flt3L-treated patients were treated with naPRRa and SEB. T-cell activation was measured by flow cytometry, representative scatter plots and bar graphs quantifying activation are shown. Statistical significance was calculated by two-way ANOVA with Tukey's multiple comparison test.

**Supplementary Figure 3: naPRRa-activated DCs cross-prime OT-I T-cells.** Splenocytes from Flt3L-treated mice were isolated, pulsed with ovalbumin protein, activated with synthetic PRRa or naPRRa, and co-cultured with OT-I cells. OT-I CD8 TC activation was measured as (a) production of IFN $\gamma$ , (b) proliferation, and (c) upregulation of CD69. Statistical significance was calculated against “No PRRa” condition by one-way ANOVA with Dunnett’s multiple comparison test.

**Supplementary Figure 4: naPRRa-activated DCs cross-present tumor-derived antigen to T-cells.** (a) Histograms depicting proliferation of cross-primed anti-GFP CD8 T-cells, quantified in adjacent graph. DC can effectively cross-present tumor-derived GFP to anti-GFP CD8 T-cells; cross-priming can be potentiated by activation of DCs with synthetic PRRa or naPRRa. Statistical significance was calculated by one-way ANOVA with Tukey’s multiple comparison test.

**Supplementary Figure 5: Identifying unique activation profiles of naPRRa.** (a) Scree plot showing variance explained by each PC calculated in Fig 3a. (b) Table of top phenotypic metrics and their loadings influencing the two plotted PCs, PC1 and PC2. (c) CRISPR-cas9 was used to delete individual TLRs from RAW cells. Heatmap of TLR<sup>-/-</sup> RAW macrophage CD40 expression, illustrating that TLR<sup>-/-</sup> RAW cells are unable to respond to specific TLR ligands. (d, e) WT and TLR<sup>-/-</sup> RAW cells were activated with vaccine naPRRa, and flow cytometry was used to compare CD40 upregulation in WT vs TLR7<sup>-/-</sup> (d) and TLR9<sup>-/-</sup> (e)

**Supplementary Figure 6: Rational combination identifies the naPRRa triplet B/P/R that promotes anti-tumor immunity.** (a) Feature selection was performed, identifying 43 phenotypic markers that significantly correlated with DC priming of cytotoxic T-cells using a Spearman correlation p-value cutoff of <0.01. (b) Scree plot showing variance explained by each PC. (c) Table of top phenotypic metrics and their loadings influencing the two plotted PCs, PC1 and PC2. (d) Equation to determine vaccine efficacy based on positioning along PC1 from 43 phenotypic observations that correlate with TC cytotoxicity.

**Supplementary Figure 7: The naPRRa triplet B/P/R that promotes anti-tumor immunity in ISV against 4T1 mammary carcinoma.** (a) Schema of murine pre-clinical 4T1 ISV model. 4T1 tumor-bearing mice were treated i.t. with Flt3L. Tumors were then locally irradiated (XRT), and naPRRa or saline was injected i.t. Mice were monitored for tumor growth (b). (c) Schema of pre-immunization model. Mice were pre-immunized with saline or B/P/R triplet in the left subiliac area; one week later, GFP-A20 lymphoma tumors were inoculated in the right flank. GFP-A20 tumor-bearing mice were treated i.t. with Flt3L. Tumors were then locally irradiated, and B/P/R or saline was injected i.t. Mice were monitored for tumor growth (d). Statistical significance was calculated by two-way ANOVA with Dunnett’s multiple comparison test, n=10-14 mice per group.

### Supplemental Table I. Pathogen vaccines used as naPRRa

| Vaccine Name | Pathogen                                                                                                      | Vaccine Type                                 | Manufacturer     |
|--------------|---------------------------------------------------------------------------------------------------------------|----------------------------------------------|------------------|
| TICE BCG     | <i>M. tuberculosis</i>                                                                                        | Live attenuated                              | Merck & Co.      |
| M-M-R II     | Measles virus<br>Mumps virus<br>Rubella virus                                                                 | Live attenuated                              | Merck & Co.      |
| Zostavax     | Varicella zoster virus                                                                                        | Live attenuated                              | Merck & Co.      |
| RotaTeq      | <i>Rotavirus</i>                                                                                              | Live attenuated                              | Merck & Co.      |
| Fluvirin     | Influenza virus Types A and B                                                                                 | Inactivated                                  | Seqirus Vaccines |
| Havrix       | Hepatitis A virus                                                                                             | Inactivated                                  | GlaxoSmithKline  |
| Rabavert     | Rabies virus                                                                                                  | Inactivated                                  | GlaxoSmithKline  |
| IPOL         | Poliovirus types 1, 2, 3                                                                                      | Inactivated                                  | Sanofi Pasteur   |
| Pneumovax23  | <i>S. pneumoniae</i>                                                                                          | Subunit                                      | Merck & Co.      |
| Typhim Vi    | <i>S. enterica</i> serovar Typhi                                                                              | Subunit                                      | Sanofi Pasteur   |
| Menveo       | <i>N. meningitidis</i>                                                                                        | Protein conjugated subunit                   | Novartis AG      |
| PedvaxHIB    | <i>H. Influenzae</i> type b                                                                                   | Protein conjugated subunit                   | Merck & Co.      |
| Pentacel     | <i>C. diphtheriae</i><br><i>C. tetani</i><br><i>B. pertussis</i><br>Poliovirus<br><i>H. influenzae</i> type b | Protein conjugated subunit,<br>Inactivated   | Sanofi Pasteur   |
| Prevnar13    | <i>S. pneumoniae</i>                                                                                          | Protein conjugated subunit,<br>Alum adjuvant | Pfizer           |
| Engerix-B    | Hepatitis B virus                                                                                             | Subunit, Alum adjuvant                       | GlaxoSmithKline  |
| Infanrix     | <i>C. diphtheriae</i><br><i>C. tetani</i><br><i>B. Pertussis</i>                                              | Subunit, Alum adjuvant                       | GlaxoSmithKline  |
| Gardasil     | Human Papillomavirus                                                                                          | Subunit, Alum adjuvant                       | Merck & Co.      |
| Tenivac      | <i>C. diphtheriae</i><br><i>C. tetani</i>                                                                     | Subunit, Alum adjuvant                       | Sanofi Pasteur   |
| Pediarix     | <i>C. diphtheriae</i><br><i>C. tetani</i><br><i>B. Pertussis</i><br>Hepatitis B virus<br>Poliovirus           | Subunit, Inactivated, Alum<br>Adjuvant       | GlaxoSmithKline  |

### Supplemental Table II. Antibodies used for flow cytometry

| Marker | Fluorophore          | Clone | Company   | Species    |
|--------|----------------------|-------|-----------|------------|
| CD11c  | FITC                 | B-ly6 | BD        | anti-human |
| CD123  | Brilliant Violet 650 | 6H6   | Biolegend | anti-human |
| CD14   | Brilliant Violet 570 | M5E2  | Biolegend | anti-human |
| CD141  | Brilliant Violet 605 | M80   | Biolegend | anti-human |

|              |                      |          |              |            |
|--------------|----------------------|----------|--------------|------------|
| CD16         | Alexa Fluor 700      | 3G8      | Biolegend    | anti-human |
| CD19         | Pacific Blue         | 4G7      | Biolegend    | anti-human |
| CD19         | PerCP-Cy5.5          | HIB19    | Biolegend    | anti-human |
| CD1c         | PerCP-eFluor 710     | L161     | Biolegend    | anti-human |
| CD25         | Brilliant Violet 785 | M-A251   | Biolegend    | anti-human |
| CD3          | PE-Cy5               | UCHT1    | Biolegend    | anti-human |
| CD4          | Alexa Fluor 700      | RPA-T4   | Biolegend    | anti-human |
| CD40         | Brilliant Violet 711 | 5C3      | Biolegend    | anti-human |
| CD56         | PerCP-Cy5.5          | 5.1H11   | Biolegend    | anti-human |
| CD8          | Brilliant Violet 650 | RPA-T8   | Biolegend    | anti-human |
| CD80         | Brilliant Violet 421 | 2D10     | Biolegend    | anti-human |
| CD83         | Alexa Fluor 647      | HB15e    | Biolegend    | anti-human |
| CD86         | PE-Dazzle594         | IT2.2    | Biolegend    | anti-human |
| HLA-ABC      | Brilliant Violet 510 | W6/32    | Biolegend    | anti-human |
| HLA-DR       | PE-Cy7               | L243     | Biolegend    | anti-human |
| IFN $\gamma$ | PE                   | 4S.B3    | Biolegend    | anti-human |
| PD-1         | Brilliant Violet 711 | EH12.2H7 | Biolegend    | anti-human |
| PD-L1        | PE                   | 29E.2A3  | Biolegend    | anti-human |
| TNF          | Alexa Fluor 647      | MAb11    | Biolegend    | anti-human |
| (CD197) CCR7 | Brilliant Violet 421 | 4B12     | Biolegend    | anti-mouse |
| B220         | BUV496               | RA-3-6B2 | Biolegend    | anti-mouse |
| B220         | APC                  | RA-3-6B2 | Biolegend    | anti-mouse |
| B220         | Brilliant Violet 711 | RA-3-6B2 | Biolegend    | anti-mouse |
| CCR7         | PE-Cy5               | 4B12     | Biolegend    | anti-mouse |
| CD11c        | PE-Cy7               | HL3      | Biolegend    | anti-mouse |
| CD11c        | Alexa Fluor 532      | N418     | ThermoFisher | anti-mouse |
| CD11c        | Alexa Fluor 700      | N418     | Biolegend    | anti-mouse |
| CD127        | APC-eFluor 780       | A7R34    | ThermoFisher | anti-mouse |
| CD132        | PE                   | TUGm2    | Biolegend    | anti-mouse |
| CD16.2       | Pacific Blue         | 9-E9     | Biolegend    | anti-mouse |
| CD169        | PE-Dazzle594         | 3D6.112  | Biolegend    | anti-mouse |
| CD223 (Lag3) | PE                   | C9B7W    | Biolegend    | anti-mouse |
| CD25         | Brilliant Violet 785 | PC61     | Biolegend    | anti-mouse |
| CD25         | Brilliant Violet 650 | PC61     | Biolegend    | anti-mouse |
| CD3          | PerCP-Cy5.5          | 145-2C11 | Biolegend    | anti-mouse |
| CD317        | Brilliant Violet 605 | 927      | Biolegend    | anti-mouse |
| CD4          | FITC                 | RM4-5    | Biolegend    | anti-mouse |
| CD4          | Brilliant Violet 650 | RM4-5    | Biolegend    | anti-mouse |
| CD4          | Brilliant Violet 785 | RM4-5    | Biolegend    | anti-mouse |
| CD4          | Alexa Fluor 700      | RM4-5    | Biolegend    | anti-mouse |
| CD40         | APC                  | 3/23     | Biolegend    | anti-mouse |
| CD44         | PE-Cy5               | IM7      | Biolegend    | anti-mouse |
| CD45.1       | Alexa Fluor 700      | A20      | Biolegend    | anti-mouse |

|              |                      |           |              |                       |
|--------------|----------------------|-----------|--------------|-----------------------|
| CD49b        | Brilliant Violet 421 | DX5       | Biolegend    | anti-mouse            |
| CD49b        | Alexa Fluor 647      | DX5       | Biolegend    | anti-mouse            |
| CD49b        | PerCP-Cy5.5          | DX5       | Biolegend    | anti-mouse            |
| CD62L        | Brilliant Violet 570 | MEL-14    | Biolegend    | anti-mouse            |
| CD69         | PE                   | H1.2F3    | Biolegend    | anti-mouse            |
| CD69         | Alexa Fluor 647      | H1.2F3    | Biolegend    | anti-mouse            |
| CD69         | Brilliant Violet 510 | H1.2F3    | Biolegend    | anti-mouse            |
| CD8          | Pacific Orange       | 5H10      | BD           | anti-mouse            |
| CD8          | APC                  | 53-6.7    | Biolegend    | anti-mouse            |
| CD8          | PerCP-Cy5.5          | 53-6.7    | Biolegend    | anti-mouse            |
| CD8          | Brilliant Violet 480 | 53-6.7    | Biolegend    | anti-mouse            |
| CD80         | PE                   | 16-10A1   | Biolegend    | anti-mouse            |
| CD80         | PE-Cy7               | 16-10A1   | Biolegend    | anti-mouse            |
| CD86         | Alexa Fluor 700      | GL-1      | Biolegend    | anti-mouse            |
| CD86         | Brilliant Violet 480 | PO3       | BD           | anti-mouse            |
| CD8          | Brilliant Violet 711 | 53-6.7    | Biolegend    | anti-mouse            |
| CTLA-4       | PE-Dazzle594         | UC10-4B9  | Biolegend    | anti-mouse            |
| CXCR3        | Brilliant Violet 650 | CXCR3-173 | Biolegend    | anti-mouse            |
| F4/80        | PerCP-Cy5.5          | BM8       | Biolegend    | anti-mouse            |
| F4/80        | Brilliant Violet 510 | BM8       | Biolegend    | anti-mouse            |
| FoxP3        | Alexa Fluor 647      | MF-14     | Biolegend    | anti-mouse            |
| Galectin-9   | PerCP-eFluor 710     | RG9-35    | ThermoFisher | anti-mouse            |
| Granzyme B   | Pacific Blue         | QA16A02   | Biolegend    | anti-mouse            |
| H-2kd        | PerCP-Cy5.5          | SF1-1.1   | Biolegend    | anti-mouse            |
| I-Ad         | FITC                 | 39-10-8   | BD           | anti-mouse            |
| IFN $\gamma$ | PE                   | XMG1.2    | Biolegend    | anti-mouse            |
| Ki67         | PerCP-eFluor 710     | SolA15    | Invitrogen   | anti-mouse            |
| KLRG1        | Brilliant Violet 711 | 2F1       | Biolegend    | anti-mouse            |
| Ly6A/E Sca-1 | Alexa Fluor 700      | D7        | Biolegend    | anti-mouse            |
| Ly6C         | PerCP-Cy5.5          | HK1.4     | Biolegend    | anti-mouse            |
| Ly6C         | Brilliant Violet 570 | HK1.4     | Biolegend    | anti-mouse            |
| Ly6G         | PerCP-Cy5.5          | 1A8       | Biolegend    | anti-mouse            |
| PD-1         | Brilliant Violet 605 | 29F.1A12  | Biolegend    | anti-mouse            |
| PD-L1        | Brilliant Violet 711 | MIH5      | Biolegend    | anti-mouse            |
| MHC-Ib Qa-2  | Alexa Fluor 647      | 695H1-9-9 | Biolegend    | anti-mouse            |
| TCR $\beta$  | Brilliant Violet 421 | H57-597   | Biolegend    | anti-mouse            |
| TCR $\beta$  | PE-Cy7               | H57-597   | Biolegend    | anti-mouse            |
| Tim3         | PE-Dazzle594         | B8.2C12   | Biolegend    | anti-mouse            |
| TNF          | APC                  | MP6-XT22  | Biolegend    | anti-mouse            |
| TNF          | Brilliant Violet 711 | MP6-XT22  | Biolegend    | anti-mouse            |
| XCR1         | Brilliant Violet 510 | ZET       | Biolegend    | anti-mouse            |
| XCR1         | Brilliant Violet 650 | ZET       | Biolegend    | anti-mouse            |
| B220         | PerCP-Cy5.5          | RA-3-6B2  | Biolegend    | anti-mouse/anti-human |



|       |                      |          |           |                       |
|-------|----------------------|----------|-----------|-----------------------|
| B220  | Brilliant Violet 750 | RA-3-6B2 | Biolegend | anti-mouse/anti-human |
| CD11b | APC-Cy7              | M1/70    | BD        | anti-mouse/anti-human |
| CD11b | APC                  | M1/70    | Biolegend | anti-mouse/anti-human |
| CD11b | Brilliant Violet 510 | M1/70    | BD        | anti-mouse/anti-human |
| Tbet  | Brilliant Violet 785 | 4B10     | Biolegend | anti-mouse/anti-human |

### Supplemental Table III. RT- qPCR Primer Sequences (5' to 3' end)

| Gene   | Forward primer        | Reverse primer        | Species |
|--------|-----------------------|-----------------------|---------|
| ISG-15 | GGTGTCCGTGACTAACTCCAT | TGGAAAGGGTAAGACCGTCCT | Mouse   |
| IRF7   | GAGACTGGCTATTGGGGGAG  | GACCGAAATGCTTCCAGGG   | Mouse   |

### Supplemental References:

1. Hammerich L, Marron TU, Upadhyay R, Svensson-Arvelund J, Dhainaut M, Hussein S, et al. Systemic clinical tumor regressions and potentiation of PD1 blockade with in situ vaccination. *Nat Med* [Internet]. 2019;1. Available from: <https://doi.org/10.1038/s41591-019-0410-x>
2. Yadav M, Jhunjhunwala S, Phung QT, Lupardus P, Tanguay J, Bumbaca S, et al. Predicting immunogenic tumour mutations by combining mass spectrometry and exome sequencing. *Nature* [Internet]. 2014 Nov 27 [cited 2021 Nov 8];515(7528):572–6. Available from: <http://www.nature.com/articles/nature14001>
3. Pau G, Reeder J. HTSeqGenie: A NGS analysis pipeline. 2014.
4. Huber W, Carey VJ, Gentleman R, Anders S, Carlson M, Carvalho BS, et al. Orchestrating high-throughput genomic analysis with Bioconductor. *Nat Methods* [Internet]. 2015 Feb 29 [cited 2021 Feb 26];12(2):115–21. Available from: <http://www.nature.com/articles/nmeth.3252>
5. Frankish A, Diekhans M, Ferreira AM, Johnson R, Jungreis I, Loveland J, et al. GENCODE reference annotation for the human and mouse genomes. *Nucleic Acids Res* [Internet]. 2019 [cited 2021 Feb 26];47(D1):D766–73. Available from: <http://www.ncbi.nlm.nih.gov/pubmed/30357393>
6. Wu TD, Reeder J, Lawrence M, Becker G, Brauer MJ. GMAP and GSNAP for Genomic Sequence Alignment: Enhancements to Speed, Accuracy, and Functionality. *Methods Mol Biol* [Internet]. 2016 [cited 2021 Feb 26];1418:283–334. Available from: <http://www.ncbi.nlm.nih.gov/pubmed/27008021>
7. Wilm A, Aw PPK, Bertrand D, Yeo GHT, Ong SH, Wong CH, et al. LoFreq: a sequence-quality aware, ultra-sensitive variant caller for uncovering cell-population heterogeneity from high-throughput sequencing datasets. *Nucleic Acids Res* [Internet]. 2012 Dec [cited 2021 Feb 26];40(22):11189–201. Available from: <http://www.ncbi.nlm.nih.gov/pubmed/23066108>
8. Saunders CT, Wong WSW, Swamy S, Becq J, Murray LJ, Cheetham RK. Strelka: Accurate somatic small-variant calling from sequenced tumor-normal sample pairs. *Bioinformatics* [Internet]. 2012 Jul 15 [cited 2021 Feb 26];28(14):1811–7. Available from: <http://www.ncbi.nlm.nih.gov/pubmed/22581179>

9. McLaren W, Gil L, Hunt SE, Riat HS, Ritchie GRS, Thormann A, et al. The Ensembl Variant Effect Predictor. *Genome Biol* [Internet]. 2016 [cited 2021 Feb 26];17(1):122. Available from: <http://www.ncbi.nlm.nih.gov/pubmed/27268795>
10. Lawrence M, Degenhardt J, Gentleman R. VariantTools: tools for working with genetic variants [Internet]. Bioconductor; 2018. Available from: <https://bioconductor.org/packages/release/bioc/html/varianttools.html>
11. Barr C, Wu TD, Lawrence M. gmapR.
12. Jurtz V, Paul S, Andreatta M, Marcatili P, Peters B, Nielsen M. NetMHCpan-4.0: Improved Peptide-MHC Class I Interaction Predictions Integrating Eluted Ligand and Peptide Binding Affinity Data. *J Immunol* [Internet]. 2017 Oct 1 [cited 2021 Feb 26];199(9):3360–8. Available from: <http://www.ncbi.nlm.nih.gov/pubmed/28978689>
13. Vita R, Mahajan S, Overton JA, Dhanda SK, Martini S, Cantrell JR, et al. The Immune Epitope Database (IEDB): 2018 update. *Nucleic Acids Res* [Internet]. 2019 [cited 2021 Feb 26];47(D1):D339–43. Available from: <http://www.ncbi.nlm.nih.gov/pubmed/30357391>
