# Supplementary material for: Pattern recognition receptor agonists in pathogen vaccines mediate antitumor T-cell cross-priming
Source: PubMed Central journal article supplement — J Immunother Cancer. 2023 Jul 21;11(7):e007198. doi: 10.1136/jitc-2023-007198 (PMC10373699; doi:10.1136/jitc-2023-007198), 2023-07-21

**Supplementary Figure 1: Flt3L increases DC numbers and potentiates their activation.**

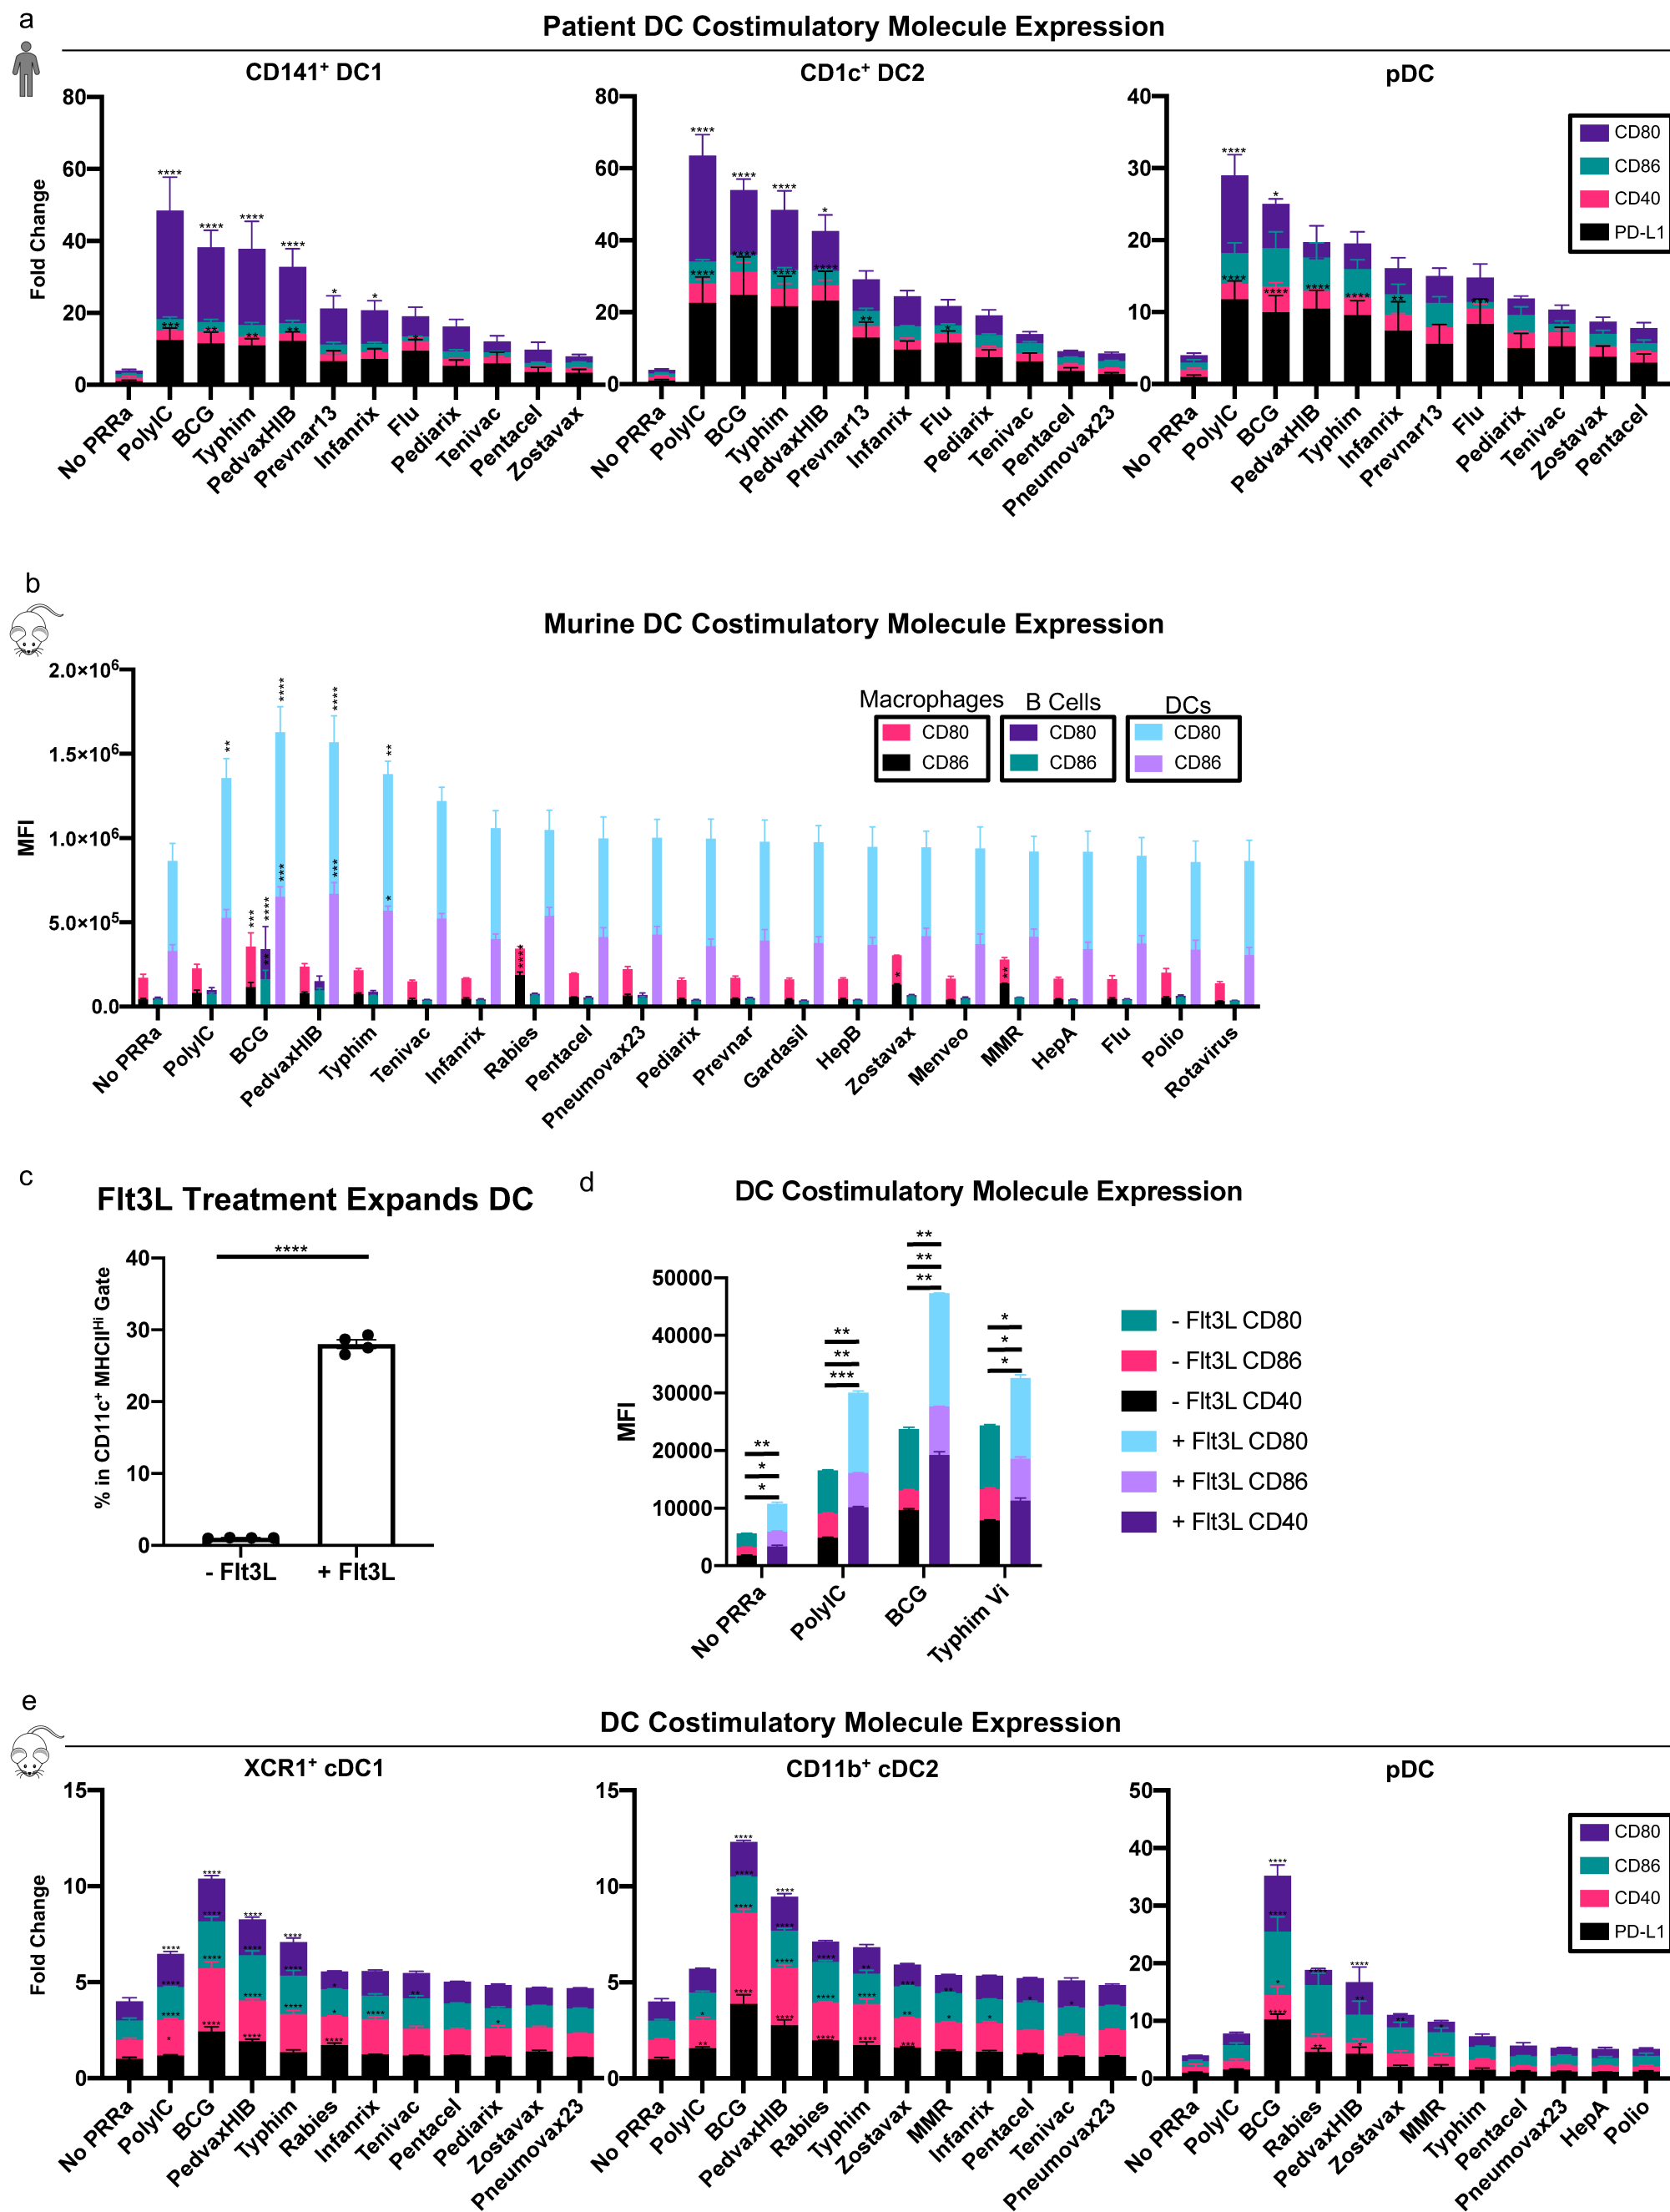

**Supplementary Figure 2: naPRRa-activated DCs prime patient T cells.**

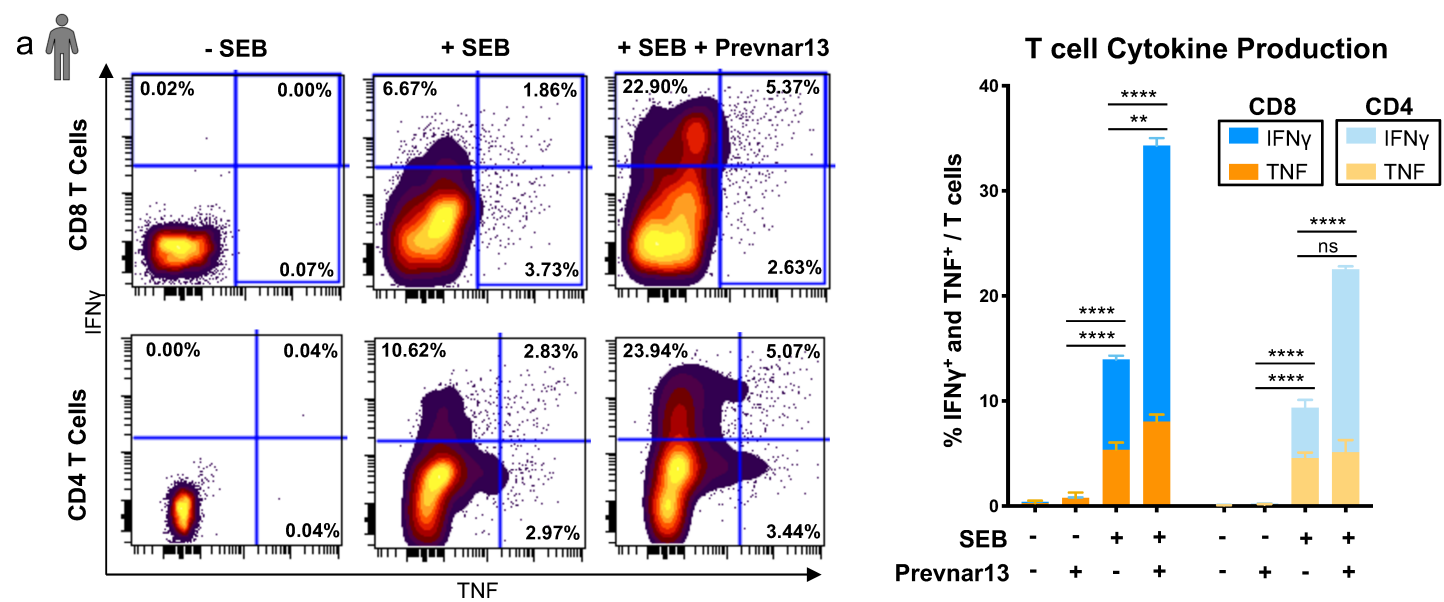

**Supplementary Figure 3: naPRRa-activated DCs cross-prime OT-I T cells.**

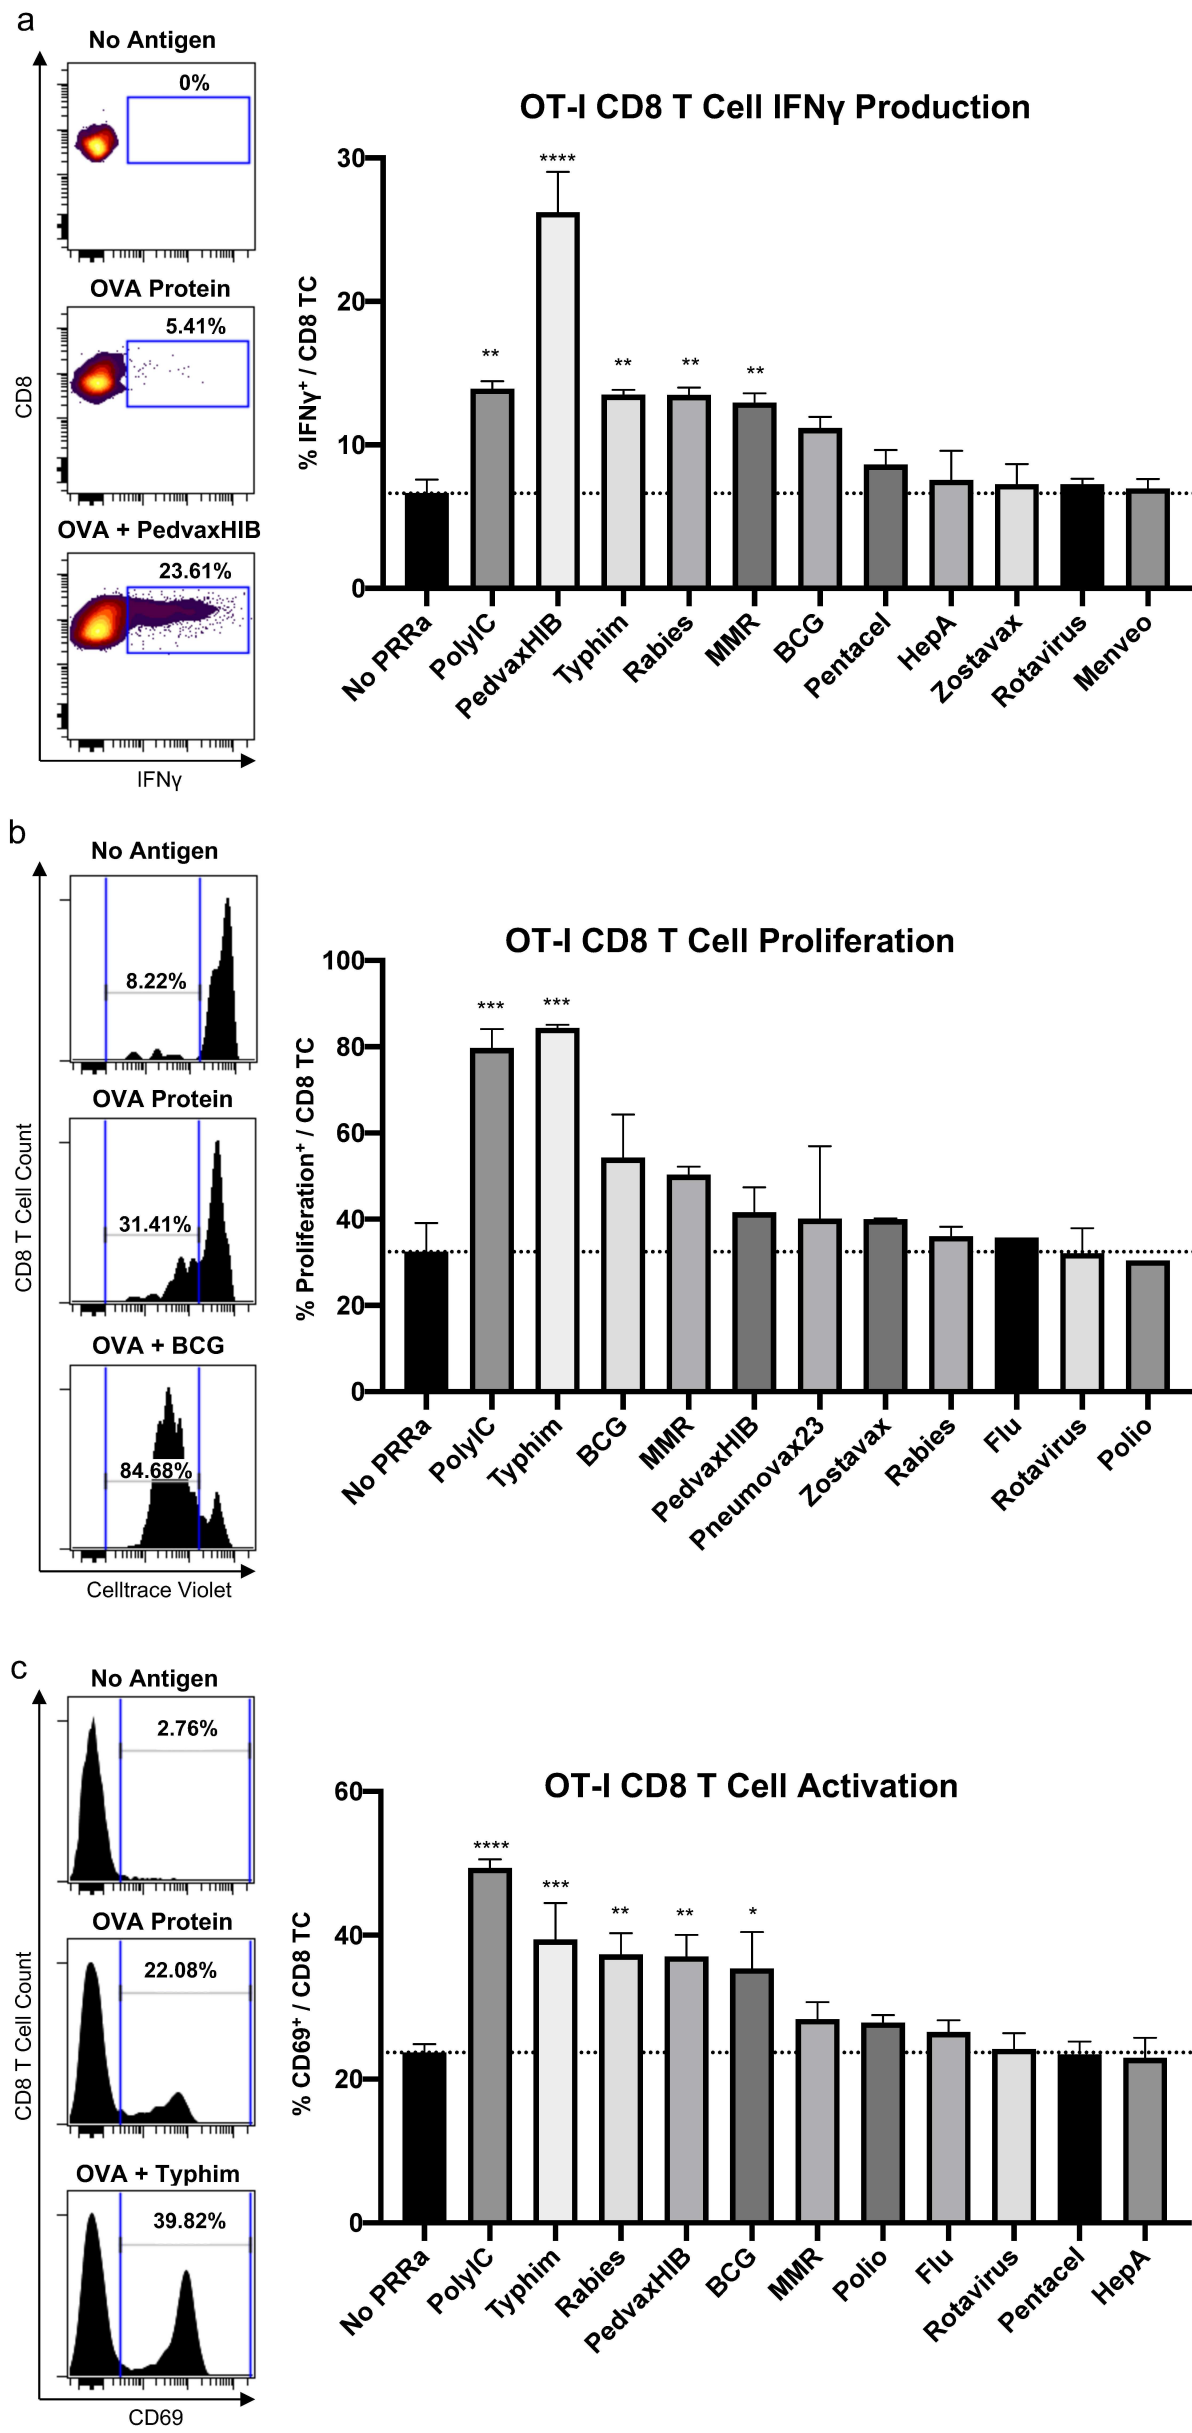

**Supplementary Figure 4: naPRRa-activated DCs cross-present tumor-derived antigen to T cells.**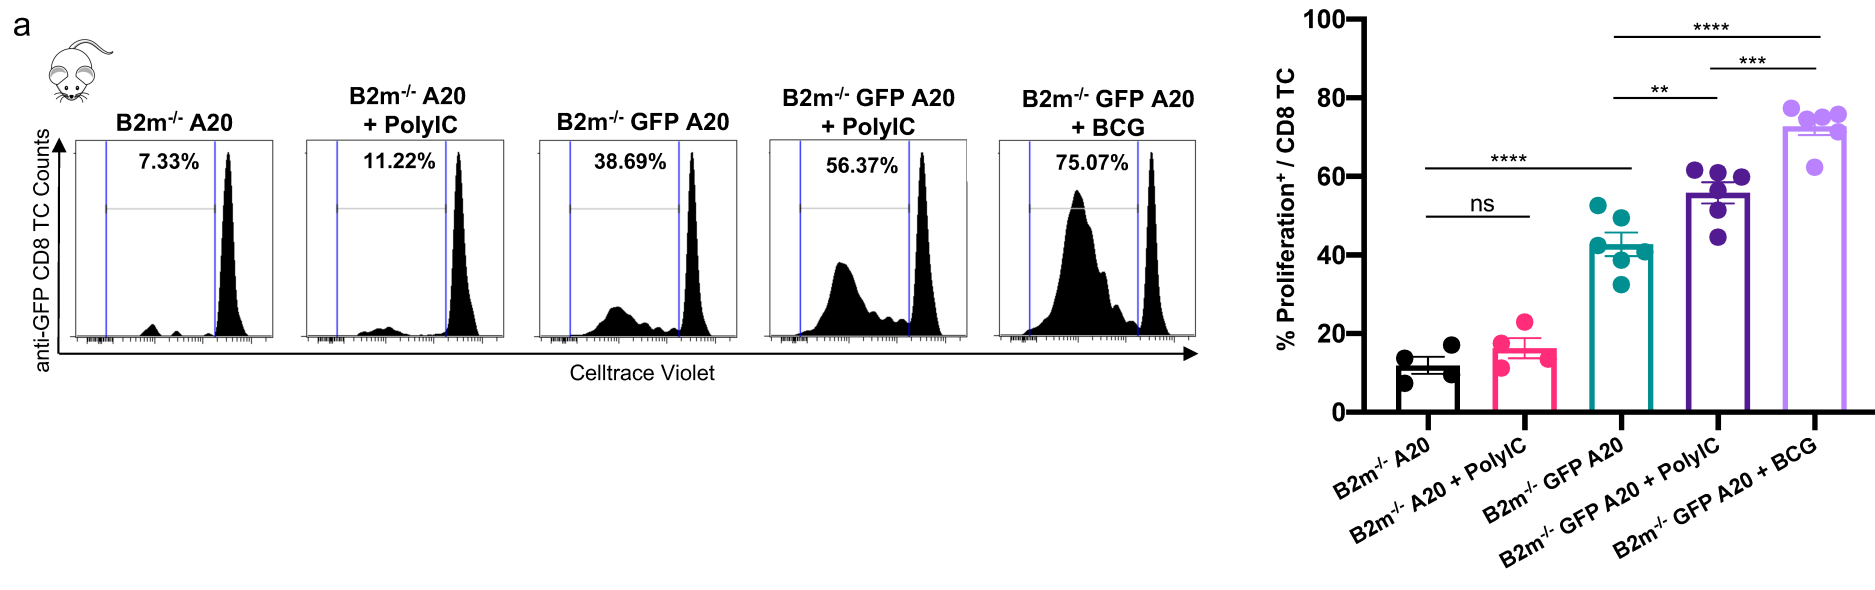

**Supplementary Figure 5: Identifying unique activation profiles of naPRRa.**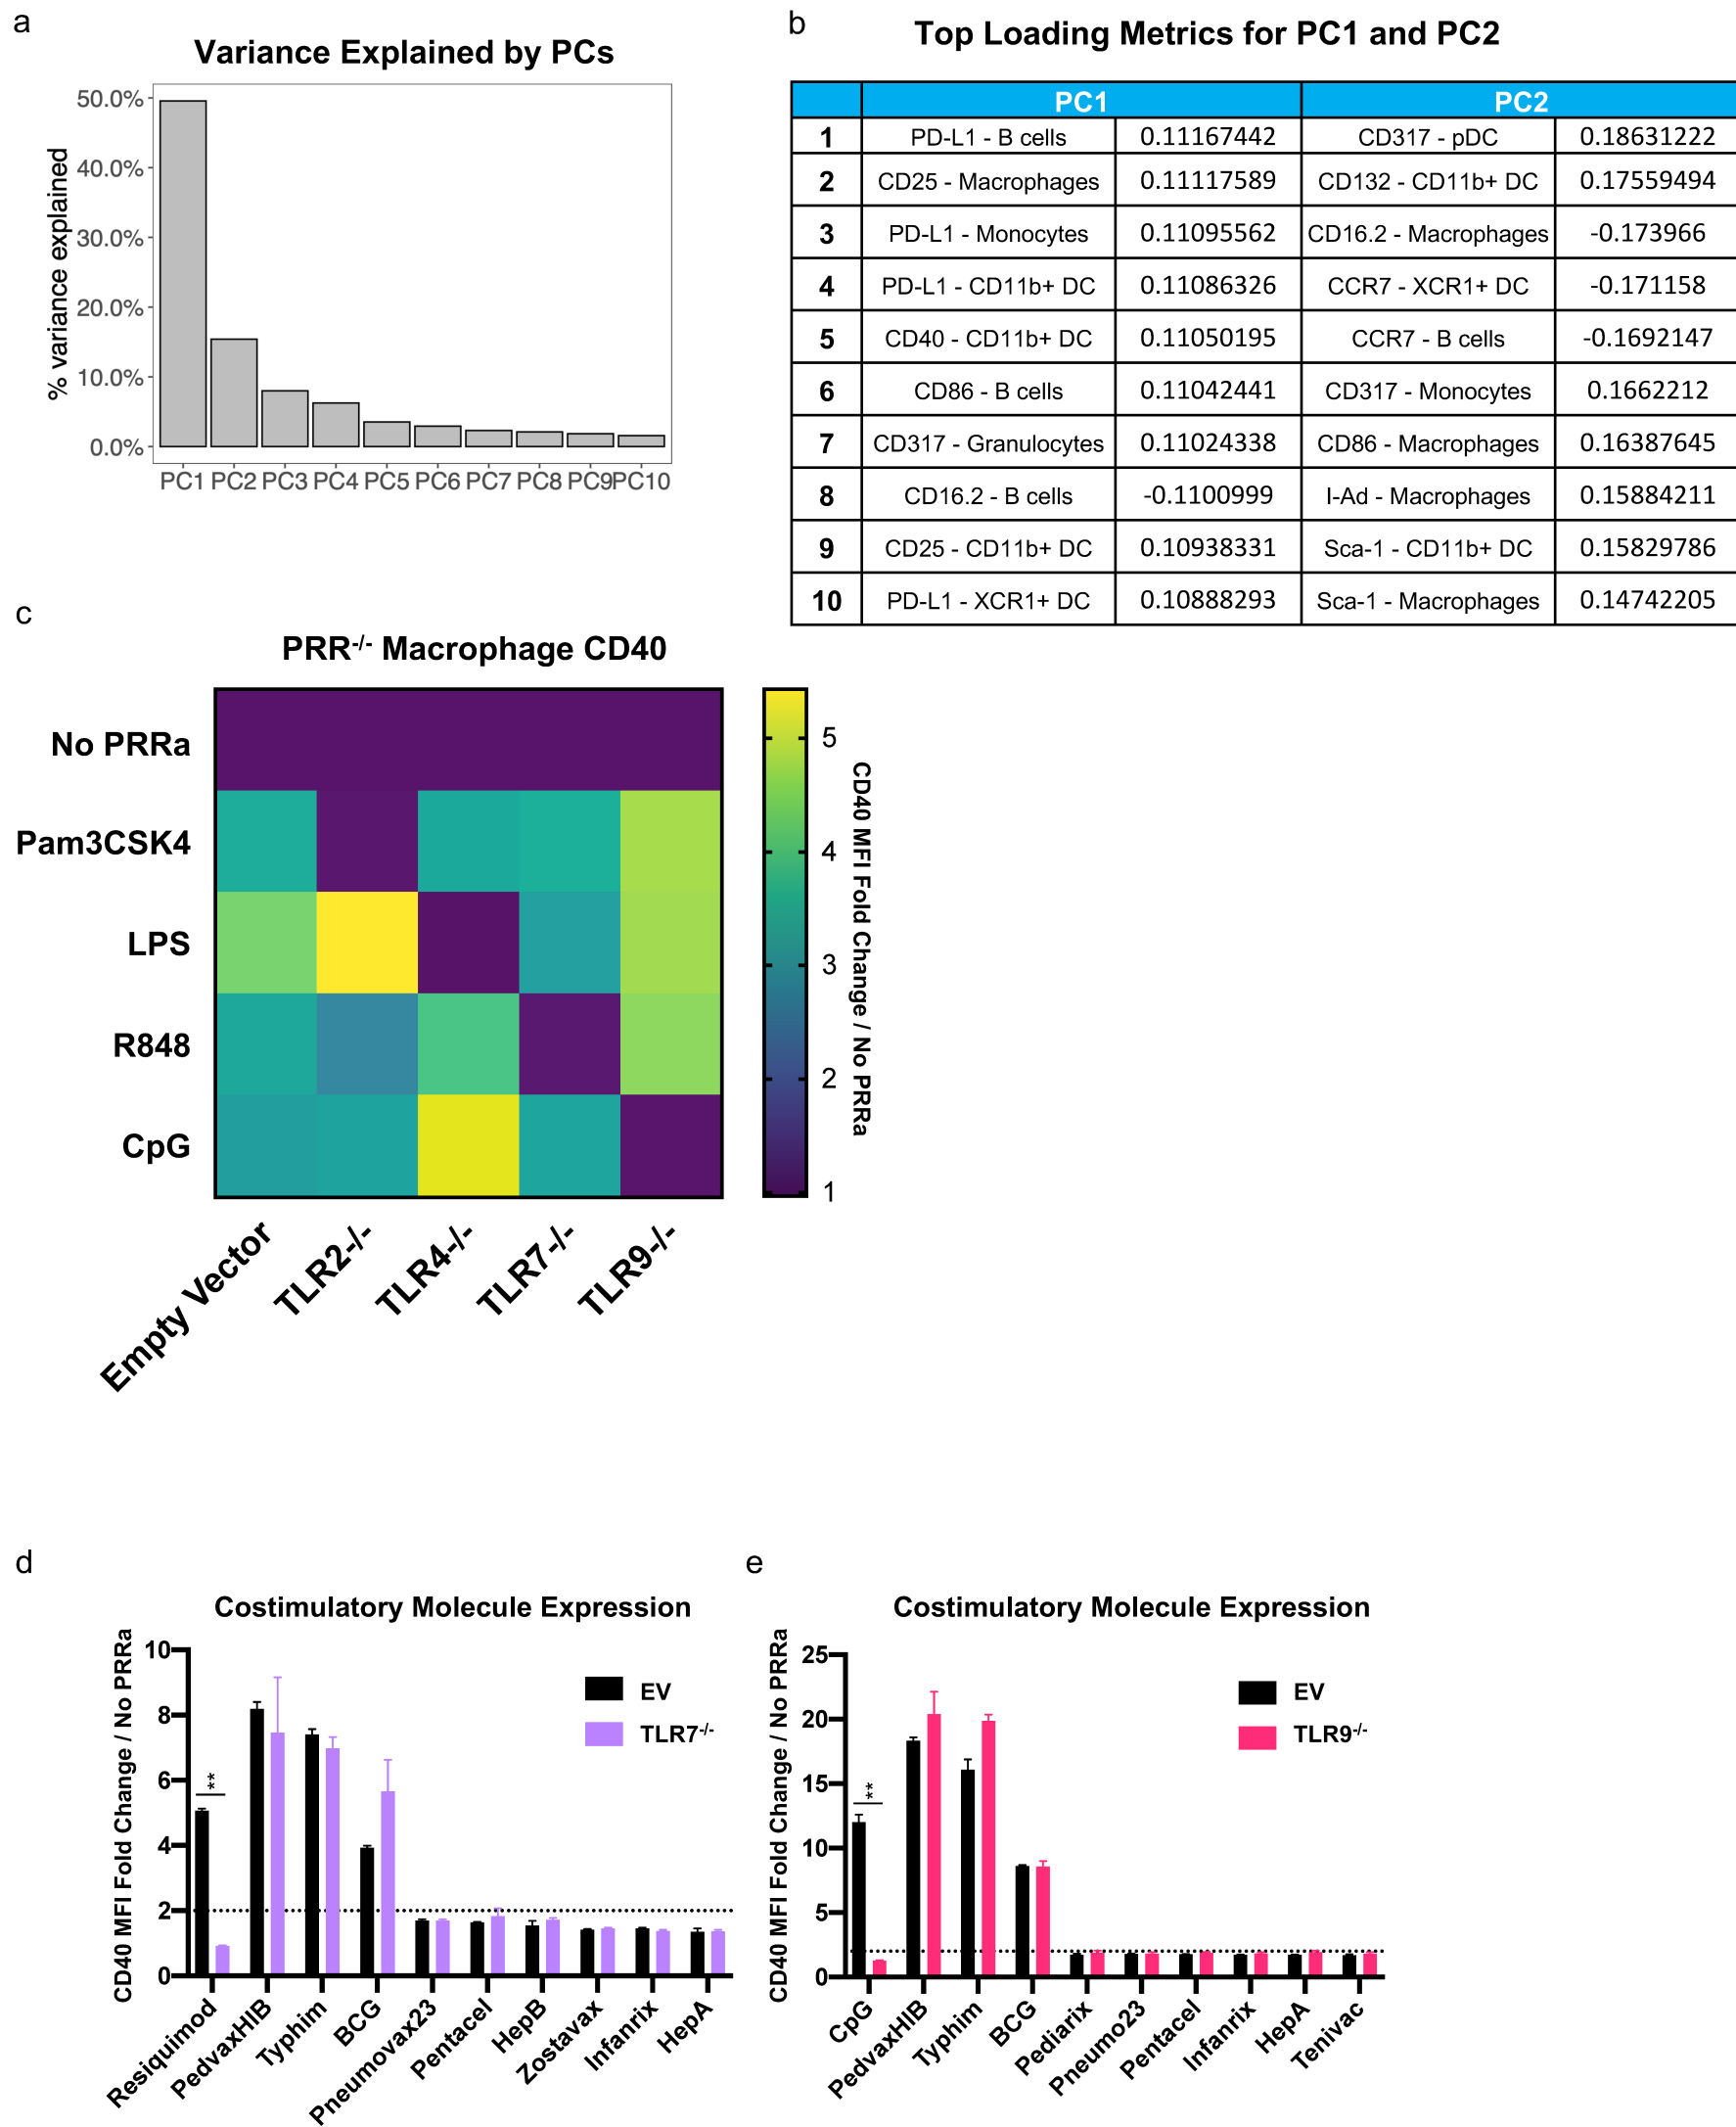

**Supplementary Figure 6: Rational combination identifies the naPRRa triplet B/P/R that promotes anti-tumor immunity.**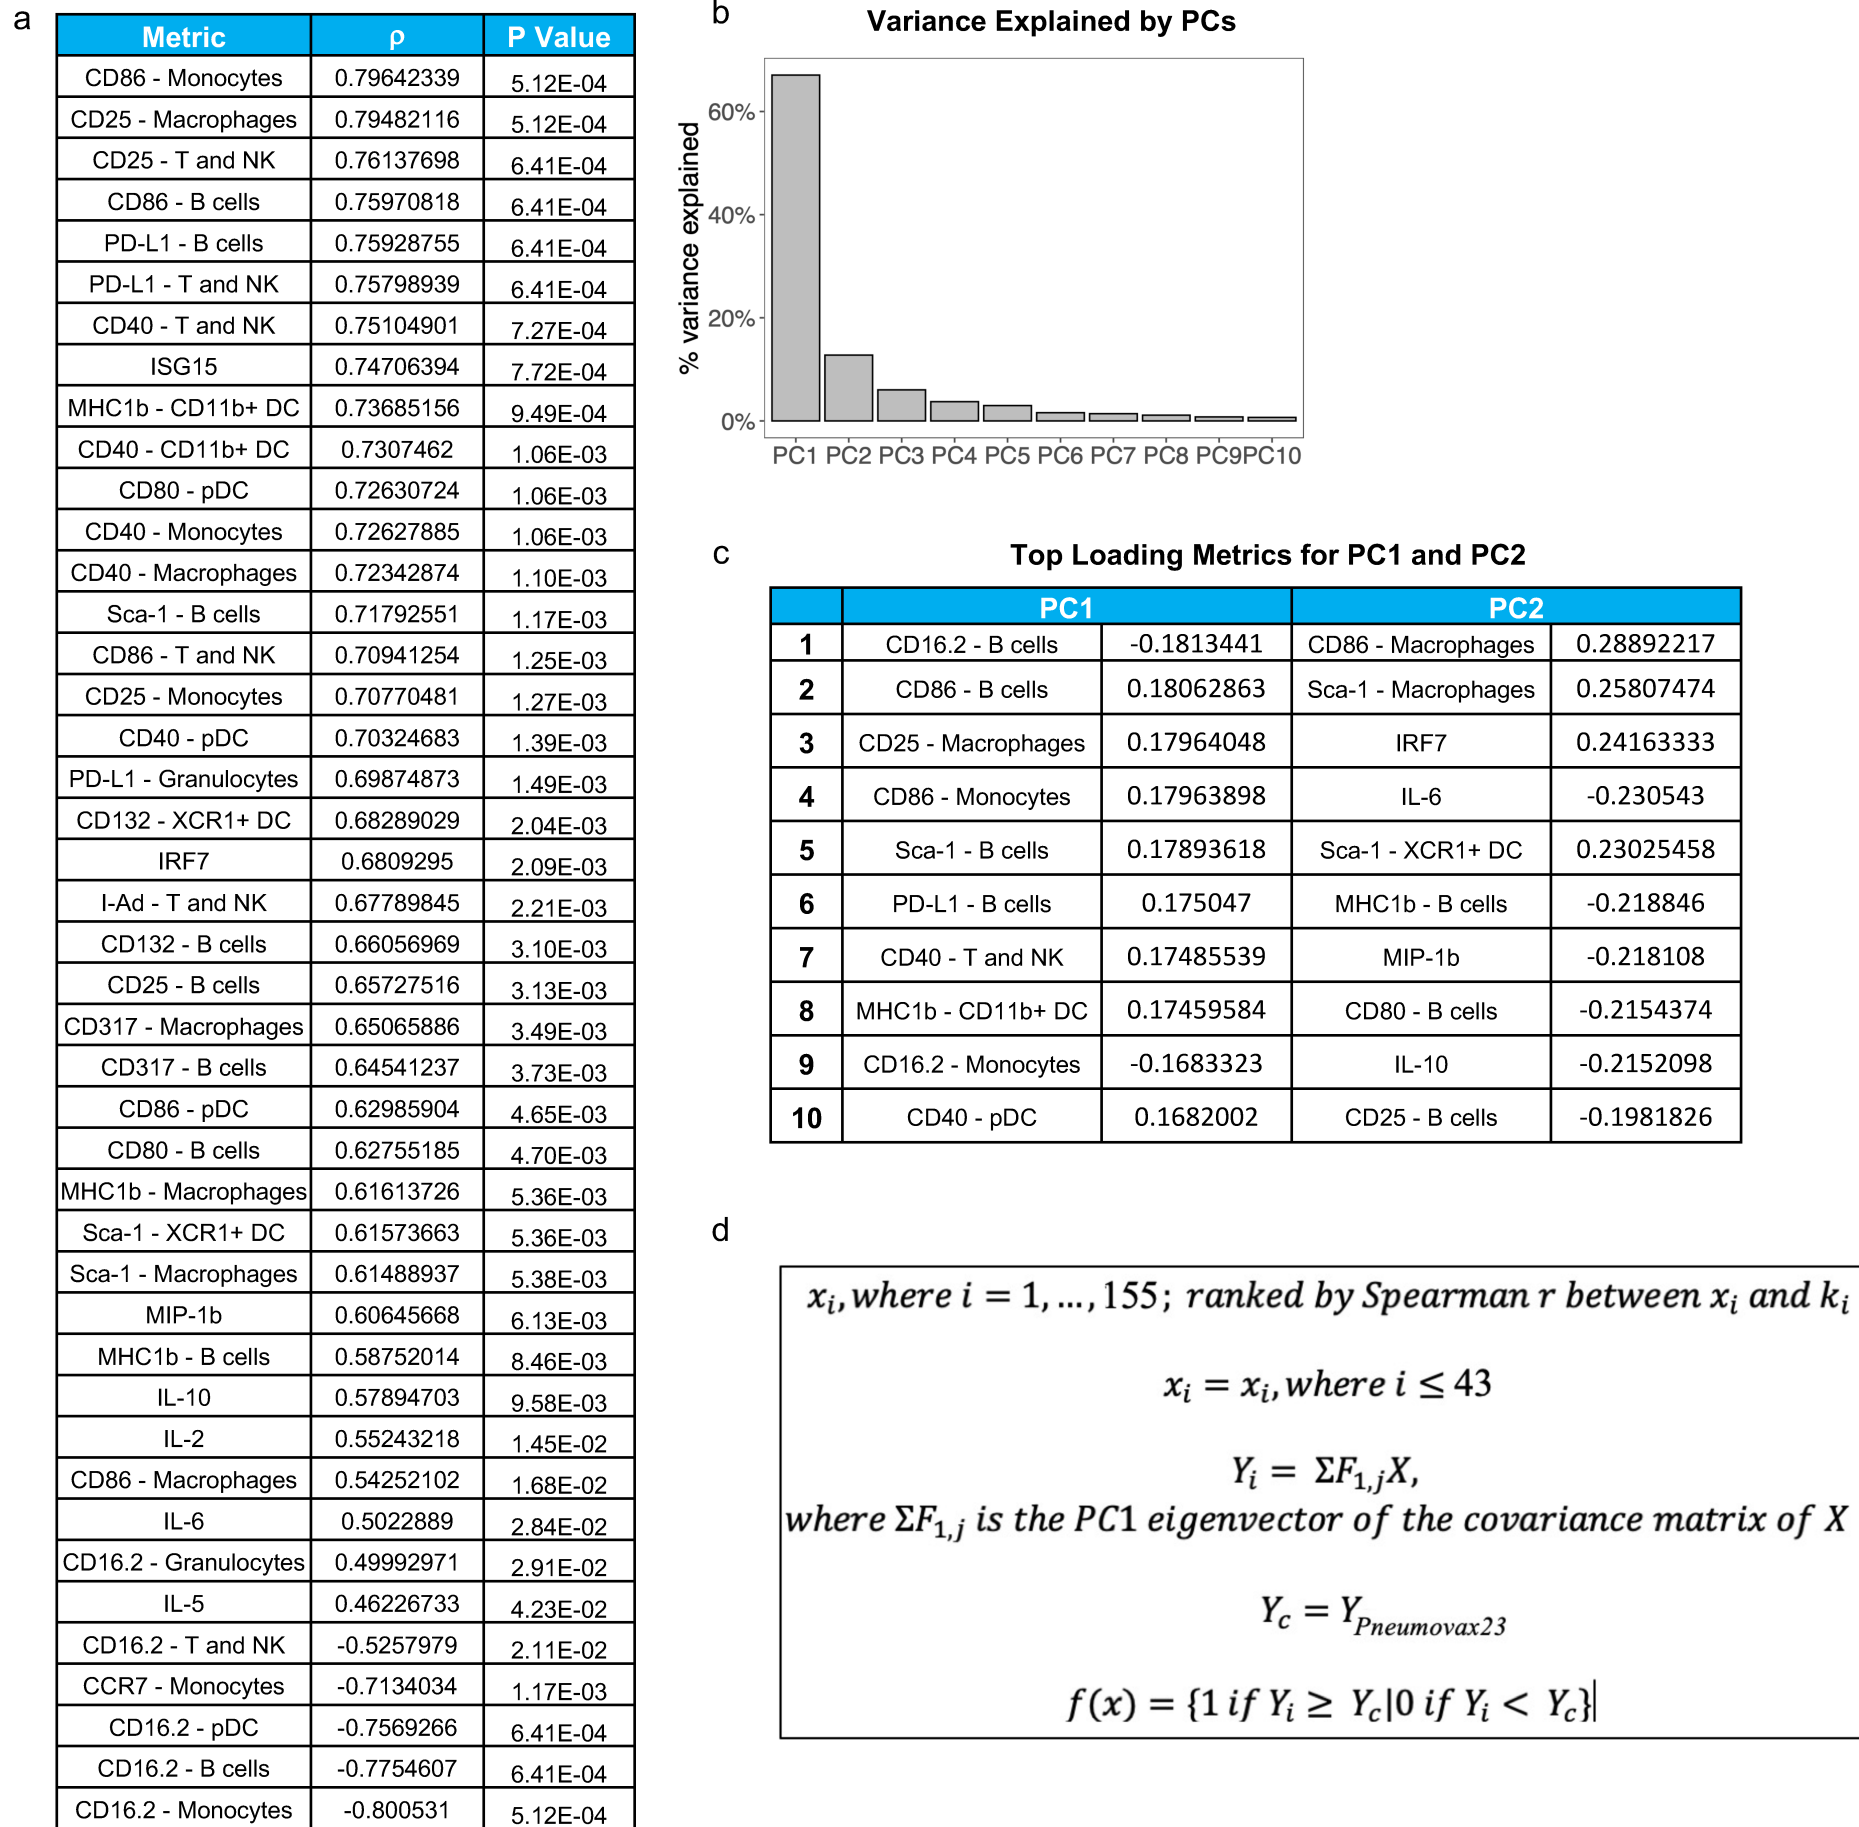

### Supplementary Figure 7: The naPRRa triplet B/P/R that promotes anti-tumor immunity in ISV against 4T1 mammary carcinoma.

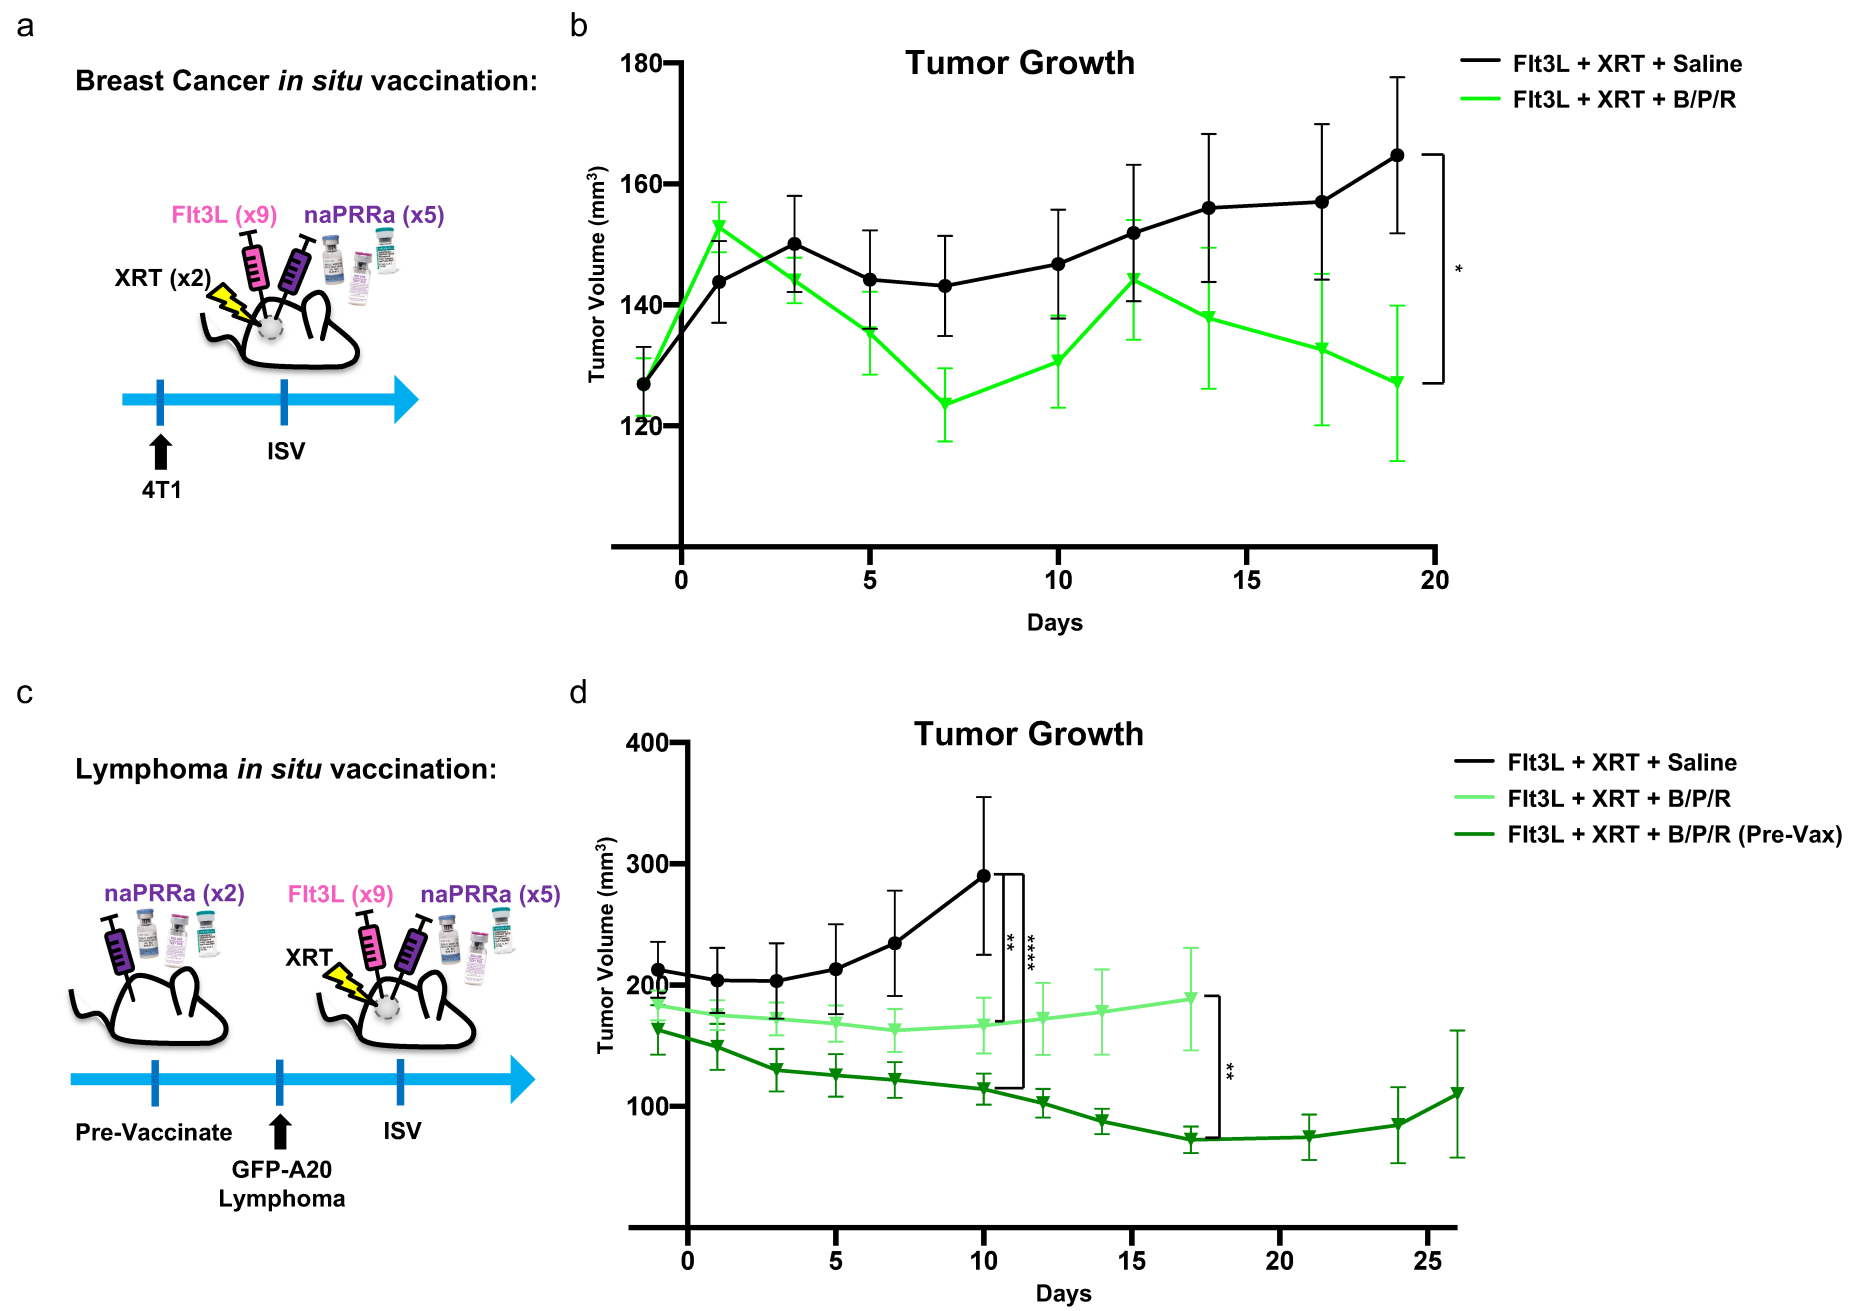

Supplement: jitc-2023-007198supp002.pdf [file jitc-2023-007198supp002.pdf]
